# Supplementary material for: Quadrangular cone carbon-constructed effective 3D network for a lightweight and broadband microwave absorbent
Source: Royal Society of Chemistry journal article supplement (doi:10.1039/d2dt02772k), 2022-01-01
Supplement: d2dt02772k1.pdf [file d2dt02772k1.pdf]

## Supporting Information

### Quadrangular Cone Carbon Constructed Effective 3D Network for Lightweight and Broadband Microwave Absorbent

*Hui Fu,<sup>a</sup> Chunyan Ding,<sup>\*,a,e</sup> Songsong Wu,<sup>\*,a,f</sup> Chengshuai Shao,<sup>a</sup> Xinsen Hu,<sup>a</sup> Hao Gu,<sup>d</sup> Xiaozhen Ren,<sup>b</sup> Long Xia,<sup>c</sup> Guangwu Wen,<sup>a,e,f</sup> and Xiaoxiao Huang,<sup>\*,c</sup>*

<sup>a</sup>School of Materials Science and Engineering, Shandong University of Technology, Zibo 255000, P.R. China

<sup>b</sup>School of Materials Science and Engineering, Liaocheng University, Liaocheng 252000, P.R. China

<sup>c</sup>School of Materials Science and Engineering, Harbin Institute of Technology, Harbin 150001, P. R. China

<sup>d</sup>Shanghai Radio Equipment Research Institute, No. 1555, Zhongchun Road, Minhang District, Shanghai

<sup>e</sup>Shandong Institute of Advanced Ceramic Co., Ltd., Zibo 255000, P. R. China

<sup>f</sup>Shandong Industrial Ceramics Research & Design Institute Co., Ltd., Zibo 255000, P. R. China

\*Contact Number: (+86) 13845075921 (X. X. Huang), (+86) 15098118986 (C. Y. Ding), (+86) 15552670275 (S. S. Wu)

\*To whom correspondence should be addressed: [swlizaxh@sina.com](mailto:swlizaxh@sina.com) (X. X. Huang); [wuss@sdut.edu.cn](mailto:wuss@sdut.edu.cn) (S. S. Wu); [dcy@sdut.edu.cn](mailto:dcy@sdut.edu.cn) (C. Y. Ding)

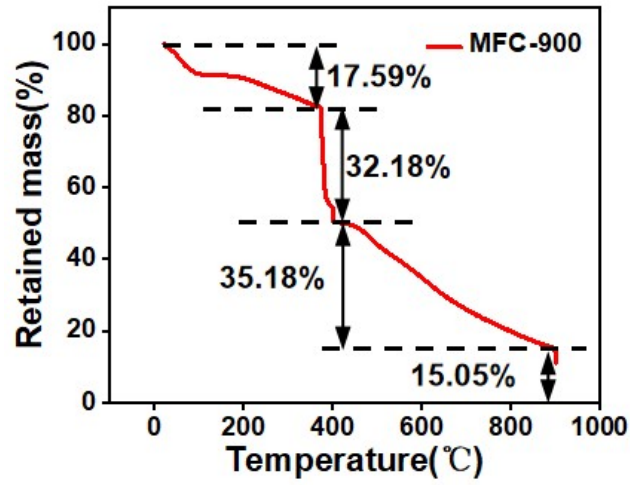

Fig. S1. TG curves of melamine foam.

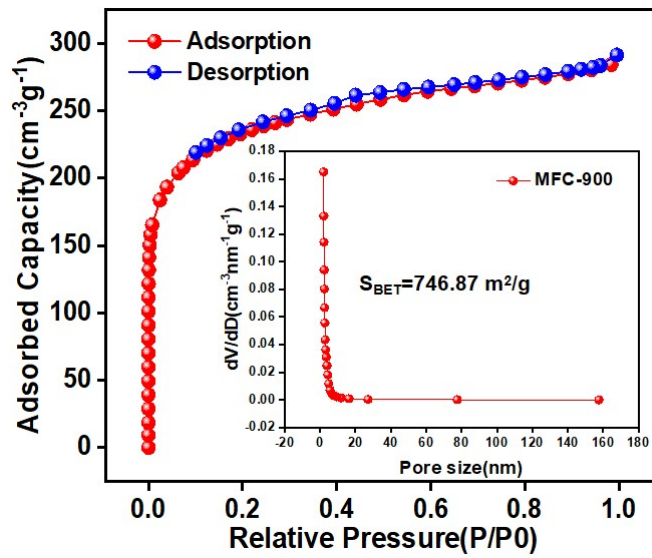

Fig. S2.  $N_2$  adsorption-desorption isotherm of MFC-900.

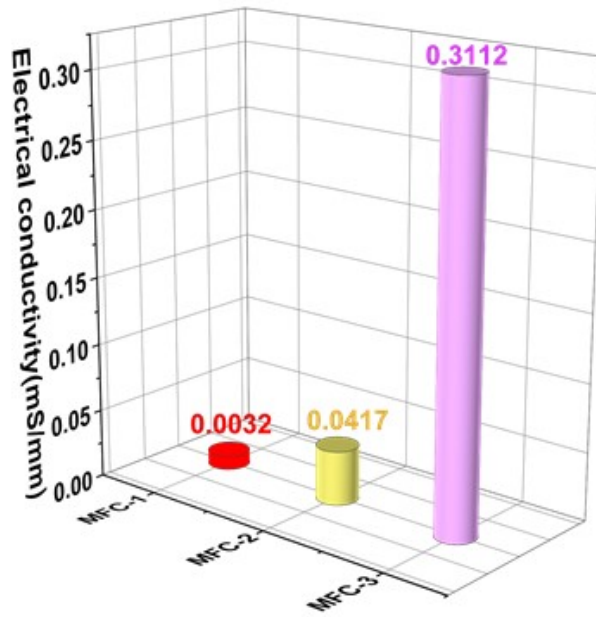

Fig. S3. Electrical conductivity of MFC-1, MFC-2, and MFC-3.

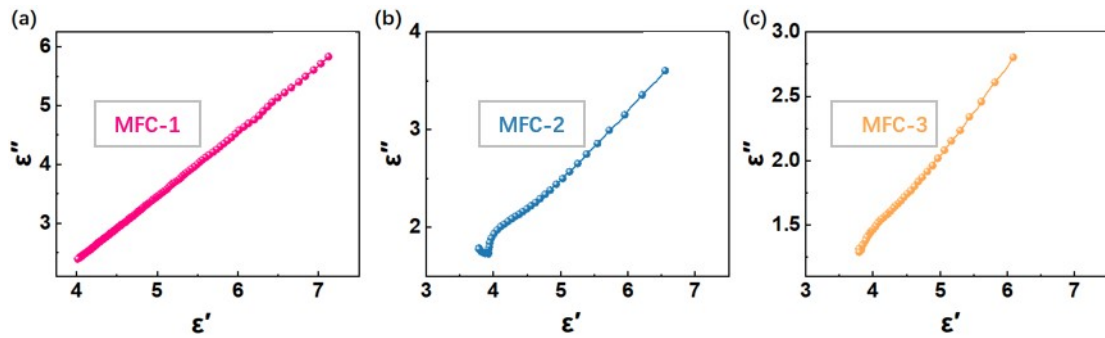

Fig. S4. Cole-Cole semicircles ( $\epsilon'$  vs.  $\epsilon''$ ) of MFC-1 (a), MFC-2 (b) and MFC-3 (c).

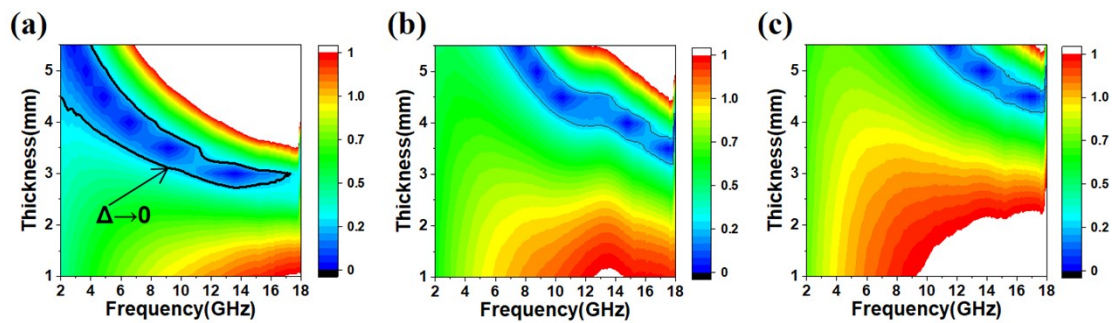

Fig. S5. Calculated delta value map of MFC-1 (a), MFC-2 (b), and MFC-3 (c).
